# Supplementary material for: Interplay between acetylation and ubiquitination controls PSAT1 protein stability in lung adenocarcinoma
Source: PubMed Central journal article supplement — Commun Biol. 2024 Oct 21;7:1365. doi: 10.1038/s42003-024-07051-2 (PMC11494179; doi:10.1038/s42003-024-07051-2), 2024-10-21
Supplement: 42003_2024_7051_MOESM3_ESM.pdf [file 42003_2024_7051_MOESM3_ESM.pdf]

## Description of Additional Supplementary Files

**File name:** Supplementary Data 1

**Description:** The results of mass spectrometry analysis between the cells transfected with Vector or Flag-PSAT1.

**File name:** Supplementary Data 2

**Description:** The untargeted metabolomics analysis between the cells transfected with Vector, His-USP14 or His-HDAC7

**File name:** Supplementary Data 3

**Description:** Source data for graphs
